# Supplementary material for: Causes and implications of the unforeseen 2016 extreme yield loss in the breadbasket of France
Source: PubMed Central journal article supplement (PMC5915531; doi:10.1038/s41467-018-04087-x), 2018-04-24
Supplement: 41467_2018_4087_MOESM1_ESM.pdf [file 41467_2018_4087_MOESM1_ESM.pdf]

# Causes and implications of the unforeseen 2016 extreme yield loss in the breadbasket of France

Tamara Ben-Ari<sup>1\*</sup>, Julien Boé<sup>2</sup>, Philippe Ciaï<sup>3</sup>, Remi Lecerf<sup>4</sup>, Marijn Van der Velde<sup>4</sup> & David Makowski<sup>1</sup>

\*Corresponding author

<sup>1</sup> INRA, AgroParisTech, UMR 211 Agronomie, Université Paris-Saclay, France

<sup>2</sup> CECI, Université de Toulouse, CERFACS/CNRS, Toulouse, France

<sup>3</sup> Laboratoire des Sciences du Climat et de l'Environnement, 91191 Gif-sur-Yvette, France

<sup>4</sup> European Commission, Joint Research Centre (JRC), Via E. Fermi 2749, I-21027 Ispra (VA), Italy

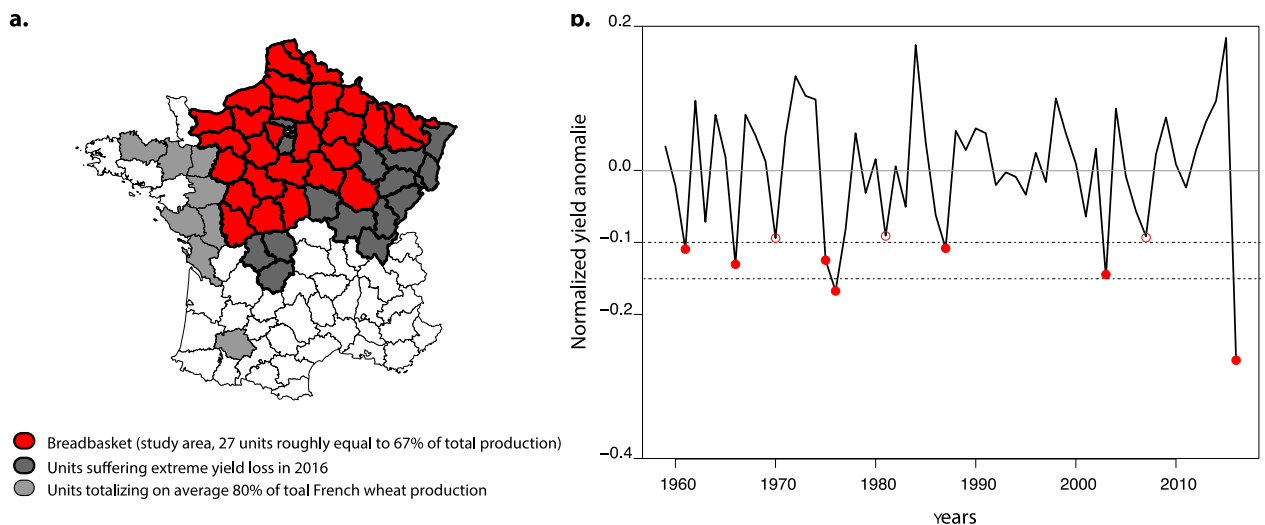

## Supplementary Figure 1. Study area and yield anomalies since 1959.

**a.** Map of the studied areas. Over the 95 counties composing metropolitan France we focus on the so-called breadbasket (in red). In an out-of-sample procedure we also estimate yield loss probabilities in two larger regions. First, over an area composed of 35 units producing at least 80% of French wheat throughout the study period (light grey) and second in the 45 units that where the most affected in 2016 (i.e., each unit lost at least 15% of yields compared to expectation; dark grey). The map was generated with R based on the yield data used in the analyses.

**b.** Time series of the inter-unit median of wheat yield anomalies (for harvest years between 1959-2016) in the study area (27 units composing the breadbasket, in red in Supplementary Figure 1). Dotted lines indicate severe and extreme levels of yield losses as defined in the main (i.e., -10% and -15% yield loss). The red dots indicate yield loss below -10%. These correspond to 1961, 1966, 1975, 1976, 1987, 2003 and 2016. As an

indication, red circles indicate yield losses very close to -10% (here strictly below -9%) corresponding to 1970, 1981 and 2007. These years are respectively highlighted in dark and light grey in Figure 3.

## Supplementary Figure 2

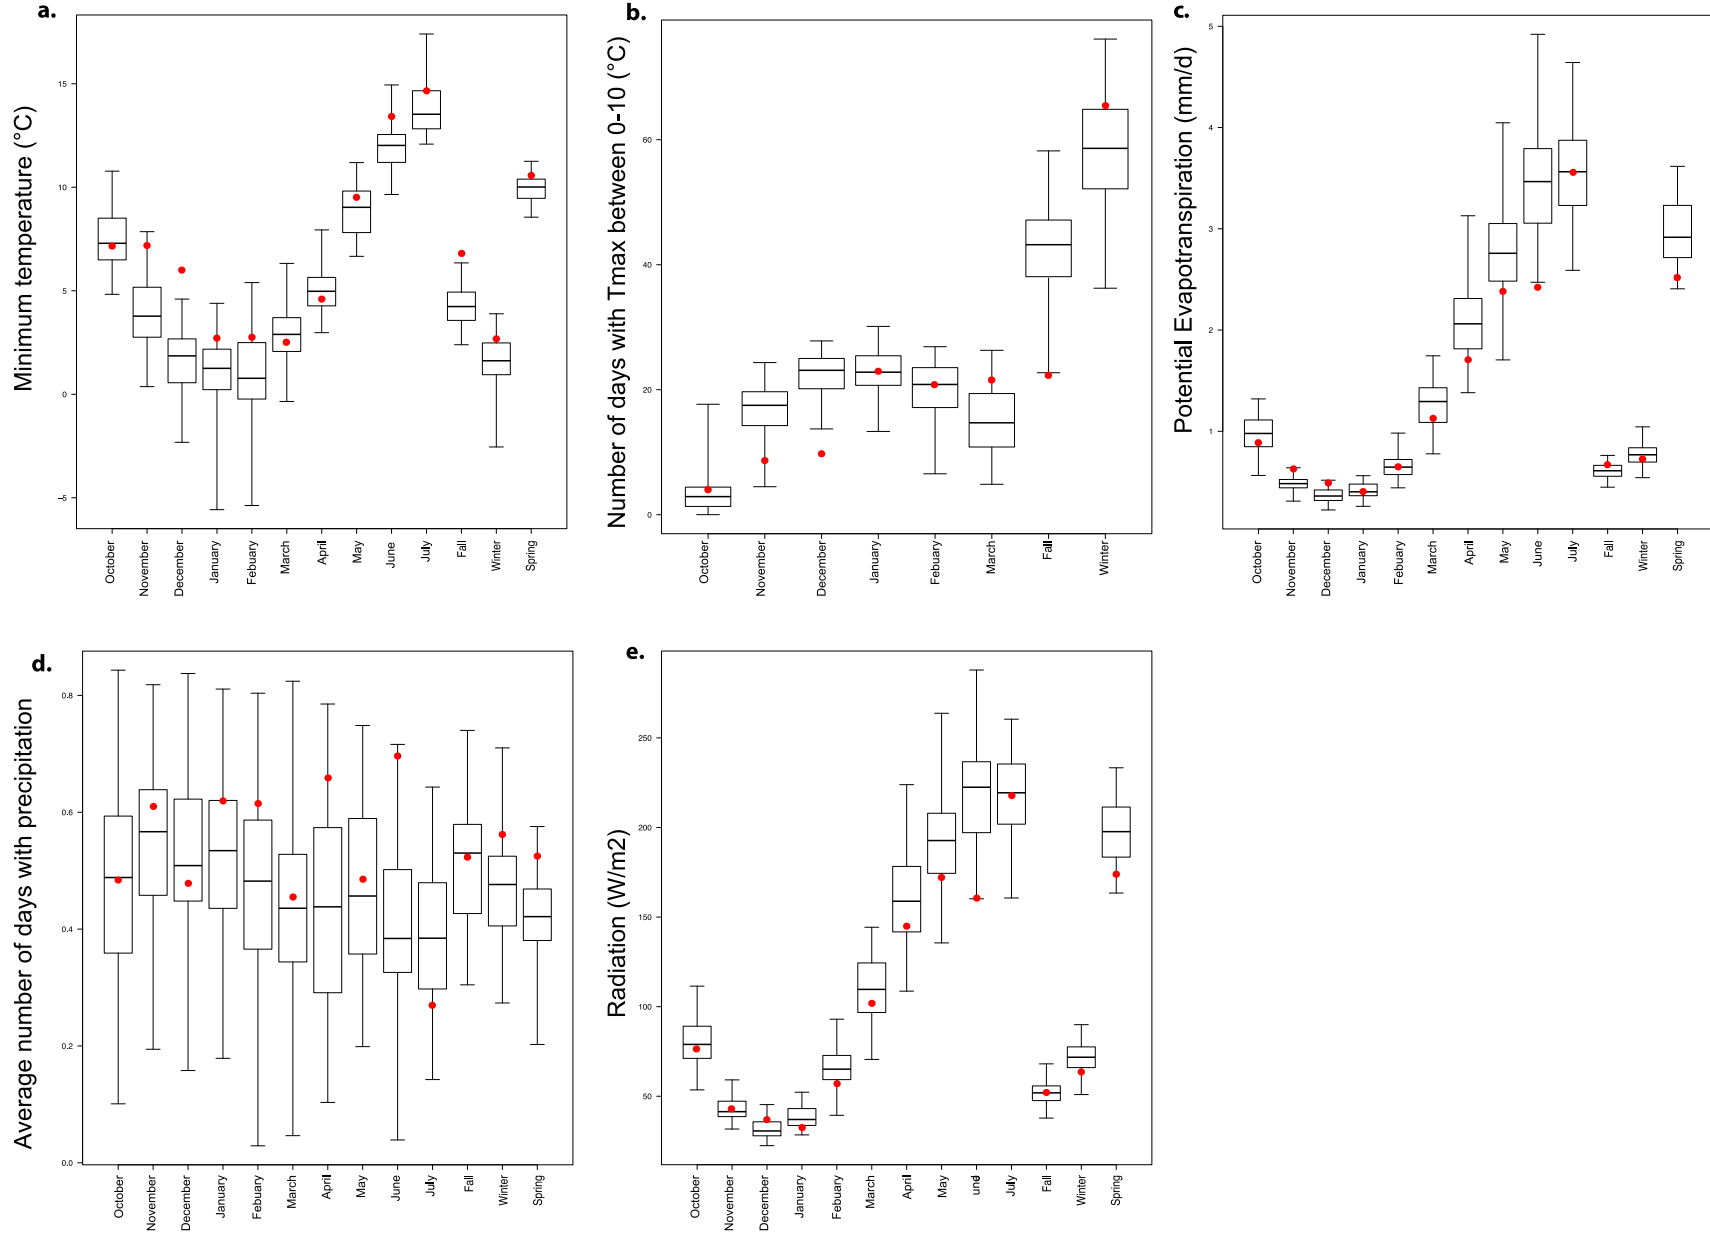

### Supplementary Figure 2. Climate variable in 2016 compared to 1959-2015

Boxplot of average for (a) the number of days between 0 and 10°C, (b) potential evapotranspiration, (c) minimum temperature, (d) radiation and (e) the number of rainy days, each year over the study area for the period corresponding to the harvest years between 1959 and 2015. Whiskers extend to maximum and minimum values. Values corresponding to the 2016 harvest are presented as red dots.

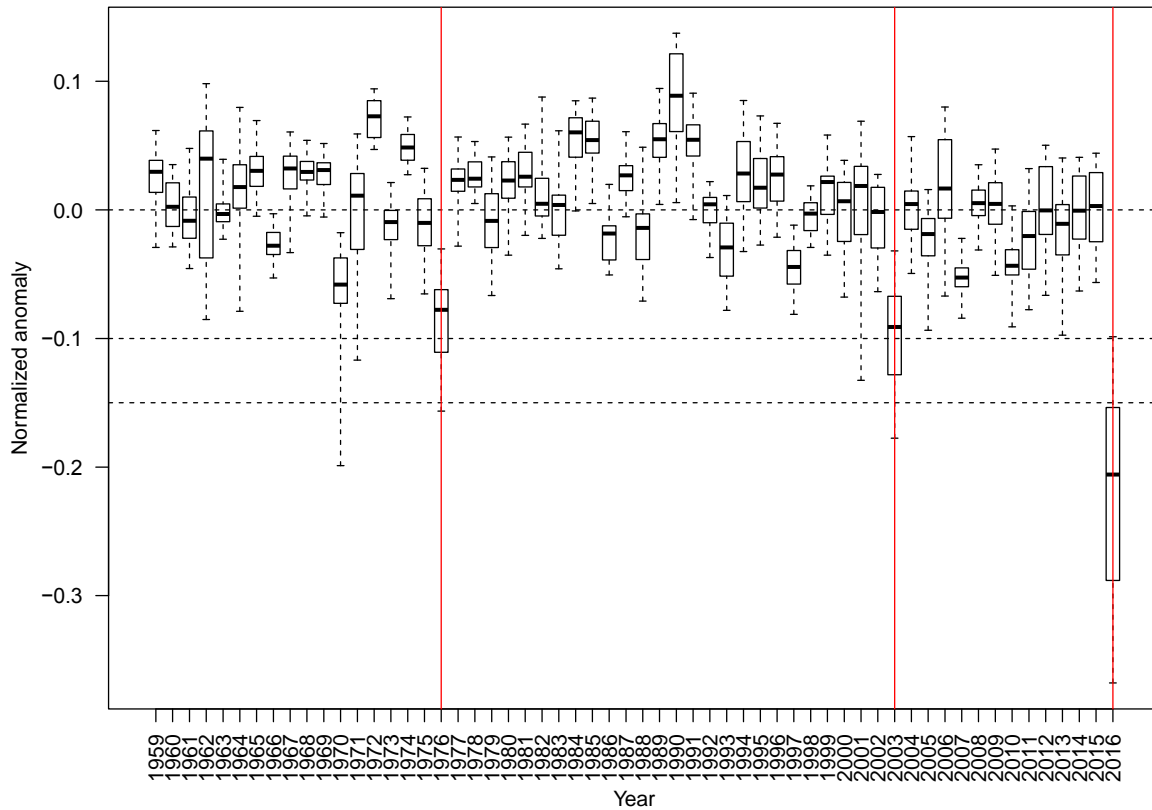

### Supplementary Figure 3. Modelled normalized anomalies

Fitted normalized anomalies for the best model selected on the same set of climate variables as for the binomial logistic regressions (Supplementary Table 2). For a detailed presentation of the model see the Supplementary discussion section. Dotted horizontal grey lines indicate the three loss levels considered (below 0, -10 and -15%). Vertical red lines indicate the three major yield loss events in 1976, 2033 and 2016.

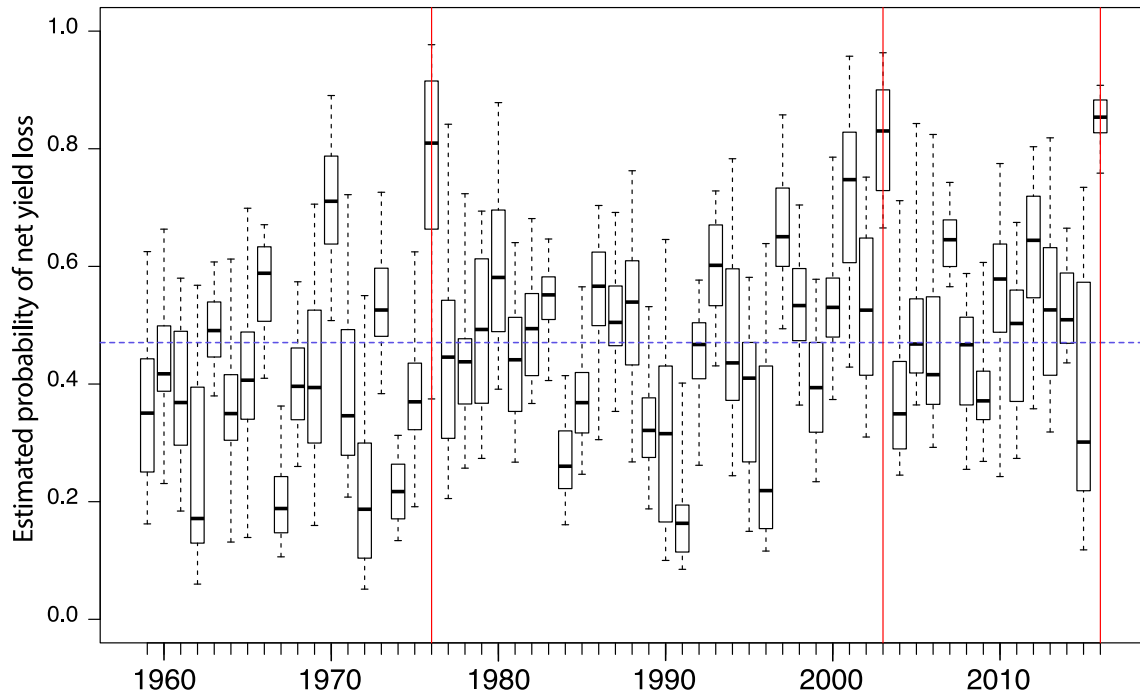

**Supplementary Figure 4. Fitted probabilities of net yield loss from selected model.** Boxplot of the time series of net yield loss probabilities estimated from selected statistical model presented in Supplementary Table 2 trained over the totality of the dataset in the study area. The range of the boxplot corresponds to inter-unit values of fitted probabilities in each harvested year. Red vertical line corresponds to the most extreme yield loss in 1976, 2003 and 2016. Dotted horizontal blue line corresponds to prior probability. Whiskers extend to minimum and maximum values. Note that the results for severe and extreme losses are presented in Figure 3.

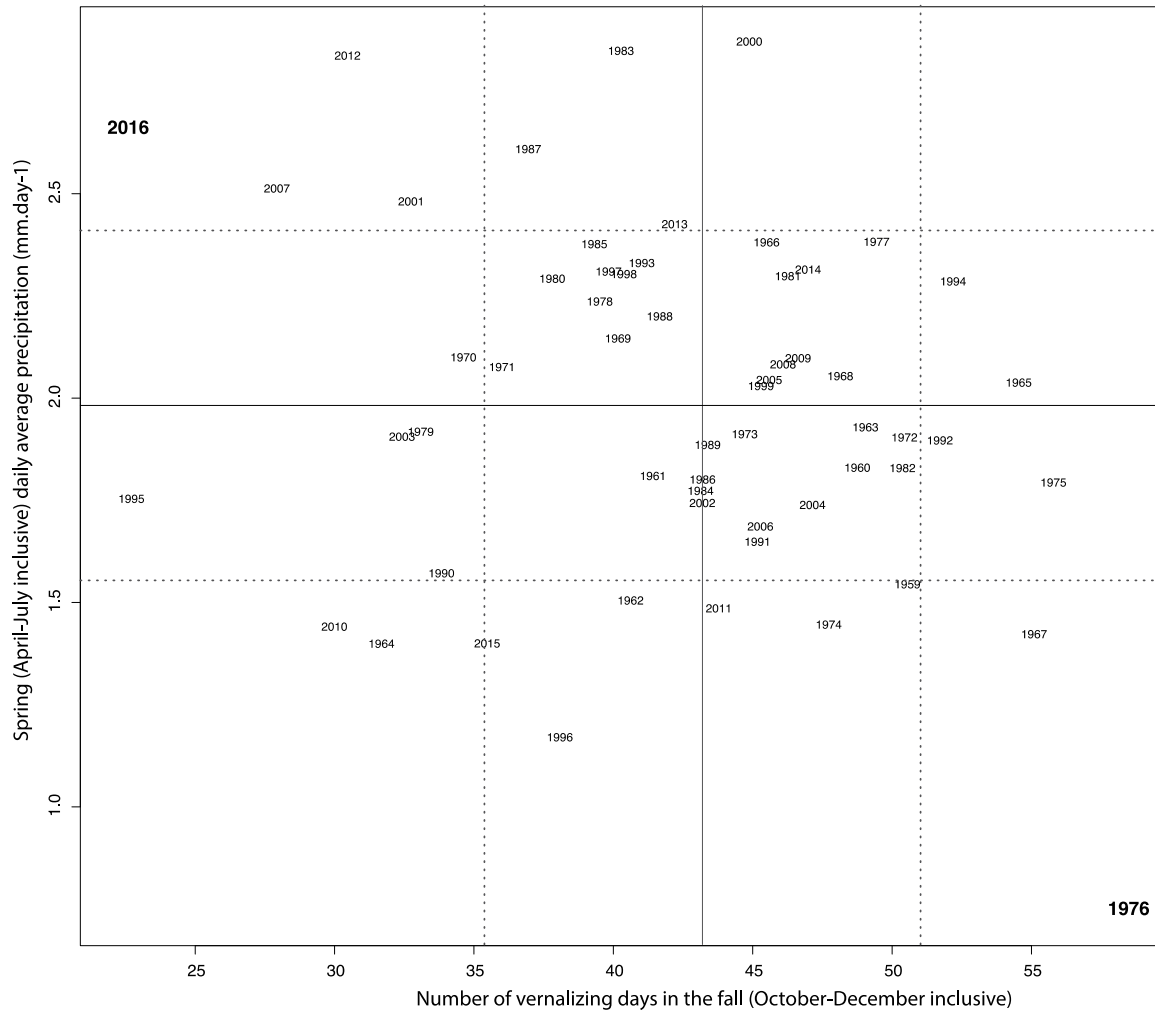

**Supplementary Figure 5. Temperature in the autumn versus precipitation in the spring**

Scatter plot of all harvest years for the number of vernalizing days for October-December (autumn) versus precipitation over April-July (spring). Median values are indicated as bold lines. Dotted lines correspond to one average $\pm$  one standard deviation. Years 2016 and 1976 are highlighted in bold.

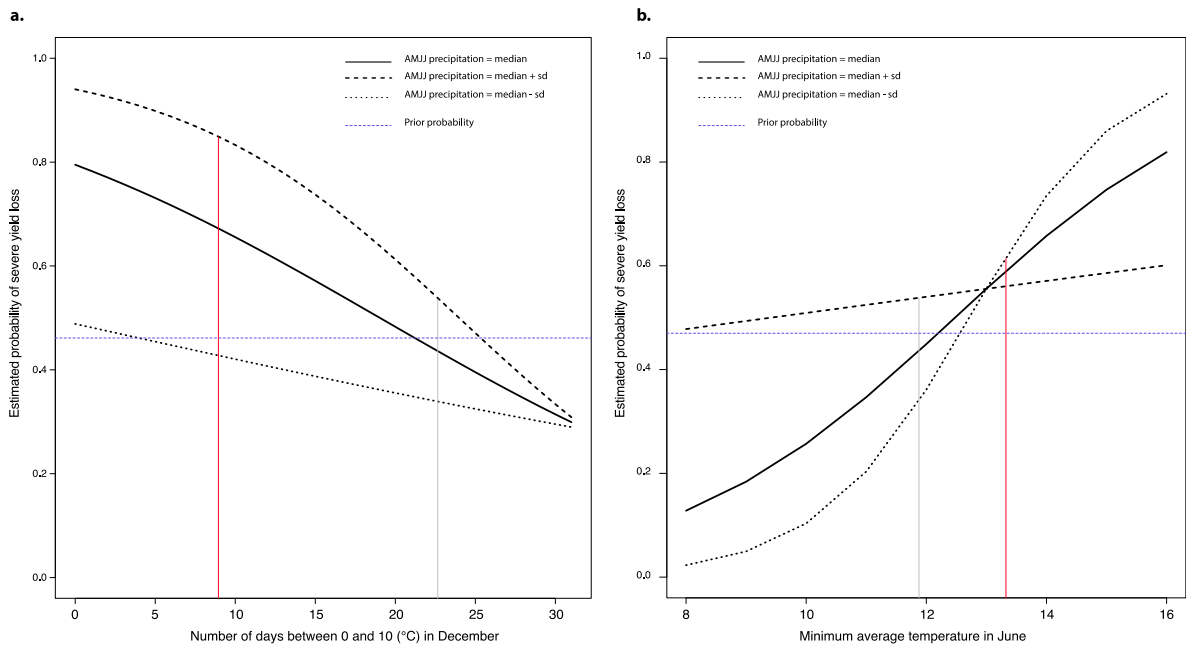

**Supplementary Figure 6. Modeled temperature - precipitation interactions for severe yield losses**

**(a) Autumn-spring interaction**

Modeled impacts of the interaction between the number of days with temperature below 10°C in December and spring precipitation on the probability of severe yield loss. Vertical grey line: median number of days with Tmax between 0 and 10°C in the dataset; red line: values in 2016. Horizontal dotted blue lines correspond to prior probabilities. These relationships are presented as a function of spring precipitation for three situations average daily precipitation is equal to its median (bold line) or equal to +/- one standard deviation (dotted lines).

**(b) spring-spring interaction**

Modeled impacts of minimum temperatures in June and precipitation in the spring, on the probability of severe yield loss. Vertical grey line: median June Tmin in the dataset; red line: values in 2016. Horizontal dotted blue lines correspond to prior probabilities. These relationships are presented as a function of spring precipitation for three situations average daily precipitation is equal to its median (bold line) or equal to +/- one standard deviation (dotted lines).

Figure S7

### Probability of net yield loss

Breadbasket - 27 departements

35 departements

45 departements

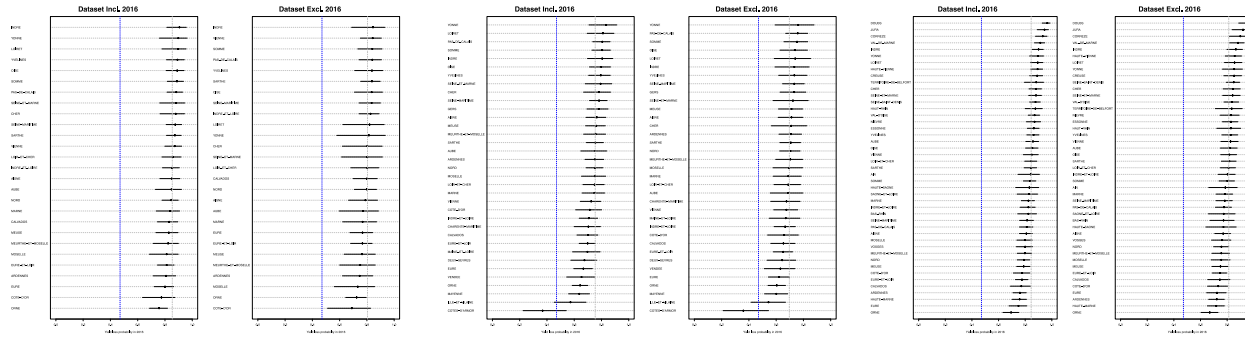

### Probability of severe yield loss

Breadbasket - 27 departements

35 departements

45 departements

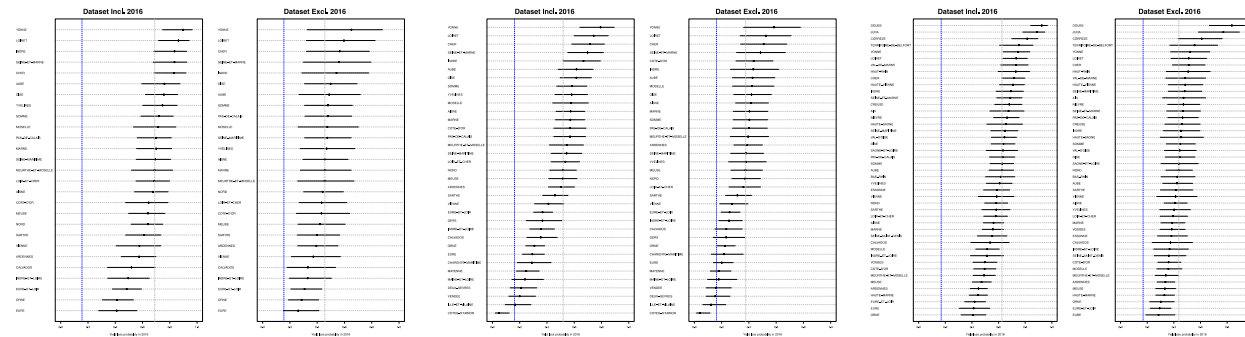

### Probability of extreme yield loss

Breadbasket - 27 departements

35 departements

45 departements

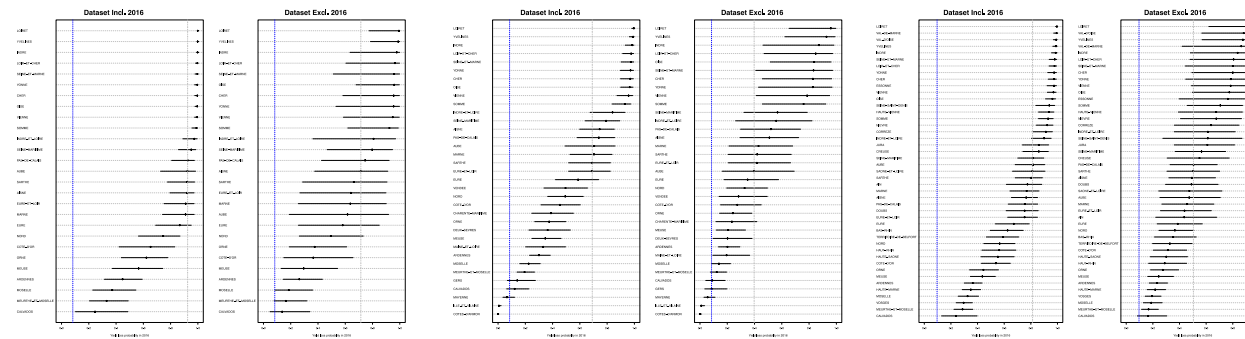



**Supplementary Figure 7. Estimated probabilities and confidence intervals in each unit of the ‘breasbasket’ and in two larger areas.**

Probabilities of net, severe and extreme yield loss from the best model trained in the study area from the dataset excluding 2016 in an out-of-sample procedure. Best models are described in Supplementary Table 2; confidence intervals are indicated as black segments. Blue dotted line indicates prior probabilities (as defined in Supplementary Table 3). Median estimated probabilities over all administrative units are indicated by dotted dark grey line. A similar figure is successively presented for the three levels of yield losses (a-c) the study area, (d-f) in an area producing 80% of total wheat in France and composed of 35 counties and (g-i) an area composed of 45 counties that were the most affected by 2016 extreme yield loss event (see also Supplementary Figure 1a. for a description of the two additional areas). Probabilities on these graphs must be considered as distances to prior probabilities.

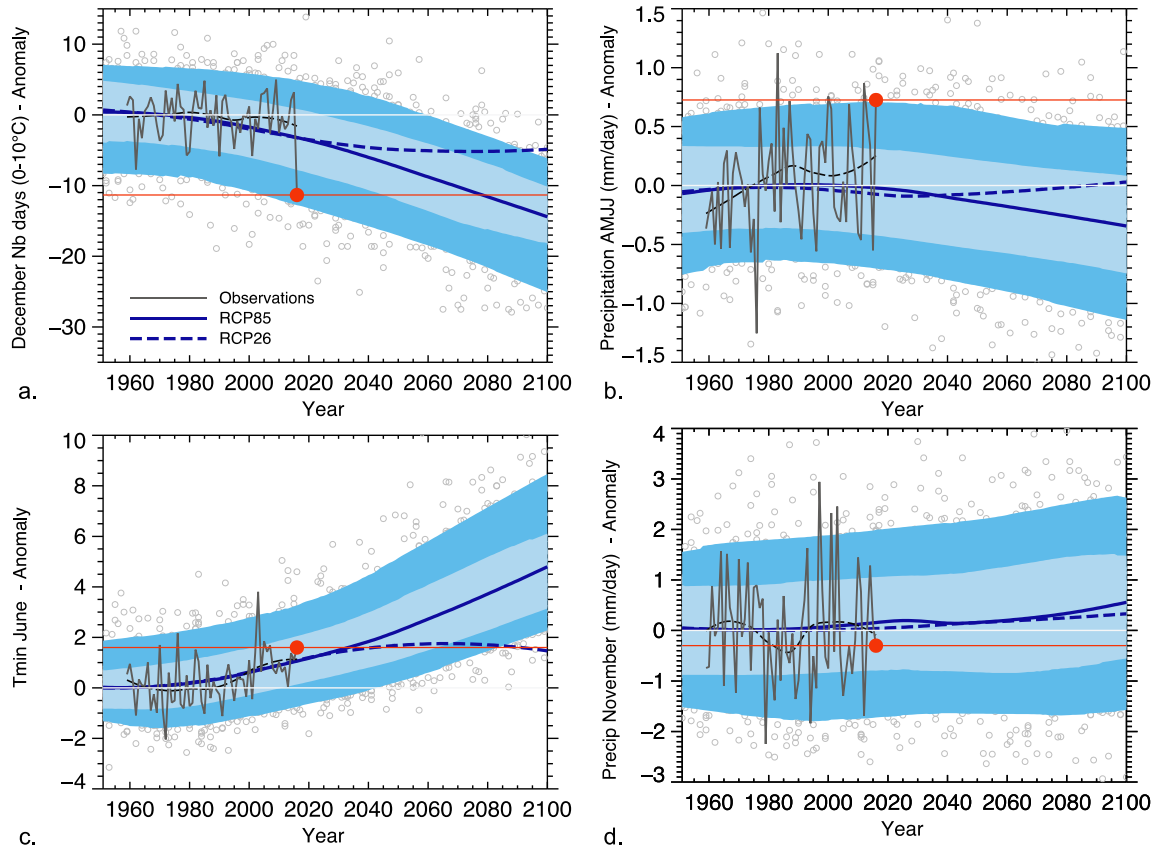

**Supplementary Figure 8. Time evolution of the four climate indices with a significant observed association with wheat yield loss (RCP 8.5).** The anomalies relative to the 1959-1988 reference period are shown (see methods) for **(a)** Number of days between 0 and 10°C, **(b)** Precipitation in spring (AMJJ, mm per day), **(c)** Minimum temperature in June (°C) and **(d)** Precipitation in November (mm per day). The dark blue lines show the multi-model median derived from an ensemble of 13 CMIP5 models and estimated by locally weighted scatterplot smoothing (LOESS) (solid line: RCP8.5 scenario. Dashed line: RCP2.6 scenario). SAFRAN results are shown with dark grey lines (black dashed line: LOESS filter results, thin line: interannual values). The light (dark) blue shaded areas show the 20-80% (5-95%) range of the models distribution for interannual values assuming the independence of models, for the historical and

RCP85 simulations. The associated delimiting quantiles are estimated with a local polynomial quantile regression. The gray points show the interannual values for the models.

### Supplementary Table 1

Description of post-harvest diagnoses of the impact of various climatic conditions during the 2015-2016 soft wheat-growing season on different phenological stages based on technical literature, extension services or expertise magazines.

| Factors                                           | Time period       | Months              | Spatial extent                              | Mechanism involved                                                                                                                                                                      | References |
|---------------------------------------------------|-------------------|---------------------|---------------------------------------------|-----------------------------------------------------------------------------------------------------------------------------------------------------------------------------------------|------------|
| <b>Excess precipitation</b>                       | Late Spring       | May-June            | East, North and central France              | Root asphyxiation                                                                                                                                                                       | (1,2)      |
| <b>Favorable temperature and Radiation</b>        | Early Spring      | March-April         | Not specified                               | Favorable to biomass formation but with fragility to lodging                                                                                                                            | (2)        |
| <b>Excess precipitation and lack of radiation</b> | Spring            | May-June            | East, North and central parts of the France | Promoted septorioses, yellow or red rust, fusarium head blights, microdochium spreads<br>Florets abortion, ovule fertilization                                                          | (1,2,3)    |
| <b>Above average temperatures</b>                 | Autumn/<br>Winter | October to February | France                                      | Created favorable conditions to both virus spreading and rust infectious potential<br>Favors the development of weeds<br>Advanced development stage<br>Aphids pressure<br>Rust inoculum | (2,4)      |
| <b>High temperatures</b>                          | Winter            | Not specified       | France                                      | High Biomass<br>Early growth stages<br>Rust inoculum                                                                                                                                    | (3)        |
| <b>Low temperatures</b>                           | Winter            | Feb-March           | France                                      | Growth slowdown<br>Reduction in diseases<br>Lodging risks increase                                                                                                                      | (3)        |

|  |  |  |  |  |  |
|--|--|--|--|--|--|
|  |  |  |  |  |  |
|--|--|--|--|--|--|

## Supplementary Table 2

### Symbol used

Some of the figures presented below use the a code for variable names:

$T_x$  stands for Tmax and  $T_n$  for Tmin,  $T_{x\_0\_10}$  stands for the number of days with Tmax between 0 and 10°C,  $rv$  for radiation,  $etp$  for potential evapotranspiration,  $pr$  for precipitation and  $pr\_per$  for the average number of days with rain per month. A suffix indicates the period in the growing season:  $O$  for October,  $N$  for November,  $D$  for December,  $Ja$  for January,  $F$  for February,  $Ma$  for March,  $A$  for April,  $My$  for May,  $Ju$  for June and  $Jy$  for July.  $OND$  corresponds to October-December (autumn) and  $AMJJ$  to April-July (spring).

### a. Initial selection

List of all variables tested in the statistical model. Each month and season is tested for October-December and April-July and for each yield loss intensity (net, severe, extreme). Wee look for the best temperature and precipitation/humidity variables, non correlated or redundant and based on the BIC criteria we compute one statistical model per yield loss level.

| YIELDLOSS                                              |             |                                                        |             | SEVEREYIELDLOSS                                        |            |                                                        |             | EXTREMEYIELDLOSS                                       |            |                                                        |            |
|--------------------------------------------------------|-------------|--------------------------------------------------------|-------------|--------------------------------------------------------|------------|--------------------------------------------------------|-------------|--------------------------------------------------------|------------|--------------------------------------------------------|------------|
| BestTemperatureAndPrecipVariableForEachUnivariateModel |             | BestTemperatureAndPrecipVariableForEachUnivariateModel |             | BestTemperatureAndPrecipVariableForEachUnivariateModel |            | BestTemperatureAndPrecipVariableForEachUnivariateModel |             | BestTemperatureAndPrecipVariableForEachUnivariateModel |            | BestTemperatureAndPrecipVariableForEachUnivariateModel |            |
| FALL                                                   |             | SPRING                                                 |             | FALL                                                   |            | SPRING                                                 |             | FALL                                                   |            | SPRING                                                 |            |
| Name                                                   | BIC         | Name                                                   | BIC         | Name                                                   | BIC        | Name                                                   | BIC         | Name                                                   | BIC        | Name                                                   | BIC        |
| tx_0_10_D                                              | 2150.960182 | tn_Ju                                                  | 2070.208153 | pr_per_N                                               | 1312.88958 | tn_Ju                                                  | 1268.357698 | pr_per_N                                               | 868.966791 | tn_Ju                                                  | 812.510427 |
| pr_N                                                   | 2159.642921 | tx34_Ju                                                | 2132.301563 | pr_N                                                   | 1328.26016 | tx34_Ju                                                | 1318.289098 | tx_0_10_D                                              | 873.819346 | tx34_Ju                                                | 874.789898 |
| pr_D                                                   | 2162.172655 | tn_AMJJ                                                | 2142.094789 | tx_0_10_D                                              | 1335.73298 | tx34_AMJJ                                              | 1340.041169 | tn_D                                                   | 884.869939 | tx34_AMJJ                                              | 884.574526 |
| pr_per_N                                               | 2164.00573  | pr_AMJJ                                                | 2142.442967 | tn_D                                                   | 1345.7641  | tx_Ju                                                  | 1346.647649 | pr_N                                                   | 887.139882 | tx_Ju                                                  | 891.749808 |
| pr_OND                                                 | 2165.271055 | tx34_AMJJ                                              | 2144.310555 | tx_O                                                   | 1350.78337 | tn_AMJJ                                                | 1349.834369 | tx_D                                                   | 887.782674 | pr_My                                                  | 892.806092 |
| pr_per_D                                               | 2165.662098 | pr_Ju                                                  | 2151.271752 | tx_D                                                   | 1350.90889 | pr_AMJJ                                                | 1350.379914 | tn_N                                                   | 888.877025 | tn_AMJJ                                                | 893.540603 |
| etp_D                                                  | 2168.666113 | tx_Ju                                                  | 2154.316459 | rv_N                                                   | 1351.81226 | rv_AMJJ                                                | 1357.334709 | tx_0_10_ON                                             | 891.585016 | pr_per_A                                               | 897.701689 |
| tx_0_10_OND                                            | 2169.752541 | pr_Jy                                                  | 2162.507837 | tn_O                                                   | 1351.96174 | pr_My                                                  | 1357.393048 | tx_N                                                   | 894.078864 | rv_Ju                                                  | 898.547378 |
| rv_N                                                   | 2170.228575 | pr_per_AMJJ                                            | 2163.36433  | tn_N                                                   | 1352.23738 | pr_Ju                                                  | 1358.011352 | tn_O                                                   | 895.458163 | rv_AMJJ                                                | 898.725529 |
| rv_D                                                   | 2170.563625 | tn_Jy                                                  | 2165.60045  | tx_0_10_ON                                             | 1359.09592 | etp_AMJJ                                               | 1358.08174  | tx_0_10_N                                              | 895.90393  | pr_AMJJ                                                | 898.908792 |
| pr_per_OND                                             | 2171.973642 | pr_per_A                                               | 2165.697185 | tx_0_10_N                                              | 1359.43291 | pr_per_A                                               | 1358.5141   | tx_O                                                   | 899.548601 | etp_AMJJ                                               | 898.940009 |
| tx34_OND                                               | 2172.885283 | tx34_Jy                                                | 2166.010484 | pr_OND                                                 | 1359.46757 | etp_My                                                 | 1360.701047 | tn_OND                                                 | 899.798539 | pr_Ju                                                  | 899.829875 |
| tx34_O                                                 | 2172.885283 | pr_per_Ju                                              | 2172.680159 | tx_N                                                   | 1359.52104 | pr_per_AMJJ                                            | 1361.24726  | rv_N                                                   | 900.193687 | pr_per_Ju                                              | 901.521883 |
| tx34_OND                                               | 2172.885283 | tx34_A                                                 | 2172.885283 | pr_per_ON                                              | 1359.75128 | rv_My                                                  | 1361.837739 | tx34_OND                                               | 903.326591 | etp_My                                                 | 902.090809 |
| tn17_O                                                 | 2172.885283 | tn17_A                                                 | 2172.885283 | etp_D                                                  | 1361.02688 | etp_Jy                                                 | 1361.960837 | tx34_O                                                 | 903.326591 | tx34_A                                                 | 903.326591 |
| tx34_N                                                 | 2172.885283 | tn17_AMJJ                                              | 2172.885283 | etp_O                                                  | 1361.06587 | rv_Ju                                                  | 1362.420656 | tx34_OND                                               | 903.326591 | tn17_A                                                 | 903.326591 |
| tn17_N                                                 | 2172.885283 | tn17_My                                                | 2172.885283 | tn_OND                                                 | 1361.76695 | tx34_A                                                 | 1362.440461 | tn17_O                                                 | 903.326591 | tn17_AMJJ                                              | 903.326591 |
| tx34_D                                                 | 2172.885283 | tn17_Ju                                                | 2172.885283 | tx_0_10_O                                              | 1361.90451 | tn17_A                                                 | 1362.440461 | tx34_N                                                 | 903.326591 | tn17_My                                                | 903.326591 |
| tx_0_10_N                                              | 2172.955651 | tn17_Jy                                                | 2172.885283 | tx34_OND                                               | 1362.44046 | tn17_AMJJ                                              | 1362.440461 | tn17_N                                                 | 903.326591 | tn17_Ju                                                | 903.326591 |
| tn17_D                                                 | 2175.143722 | tx_AMJJ                                                | 2174.357044 | tx34_O                                                 | 1362.44046 | tn17_My                                                | 1362.440461 | tx34_D                                                 | 903.326591 | tn17_Jy                                                | 903.326591 |
| tn17_OND                                               | 2175.143722 | pr_My                                                  | 2174.944127 | tx34_OND                                               | 1362.44046 | tn17_Ju                                                | 1362.440461 | tx_OND                                                 | 903.335726 | tx34_Jy                                                | 903.94173  |
| tn_N                                                   | 2175.170215 | pr_per_Jy                                              | 2175.612519 | tn17_O                                                 | 1362.44046 | tn17_Jy                                                | 1362.440461 | etp_D                                                  | 904.463158 | rv_My                                                  | 905.250402 |
| tx_O                                                   | 2175.285908 | tx_0_10_My                                             | 2175.615834 | tx34_N                                                 | 1362.44046 | tn_A                                                   | 1364.09259  | pr_per_O                                               | 905.698146 | etp_A                                                  | 905.588592 |
| tn_O                                                   | 2175.656028 | tx_0_10_Ju                                             | 2176.113667 | tn17_N                                                 | 1362.44046 | tx34_Jy                                                | 1364.127759 | etp_N                                                  | 906.345538 | etp_Ju                                                 | 905.729225 |
| etp_N                                                  | 2175.945279 | tn_A                                                   | 2176.452559 | tx34_D                                                 | 1362.44046 | etp_A                                                  | 1364.192786 | etp_O                                                  | 906.745574 | etp_Jy                                                 | 905.823638 |
| tn_D                                                   | 2176.546789 | etp_A                                                  | 2176.937663 | tn17_D                                                 | 1362.07911 | pr_per_Ju                                              | 1364.274203 | pr_per_ON                                              | 908.156137 | tx_0_10_My                                             | 905.861071 |
| tx_0_10_O                                              | 2177.619281 | tx34_My                                                | 2177.223923 | tn17_OND                                               | 1362.07911 | rv_A                                                   | 1365.353088 | pr_O                                                   | 908.301354 | pr_per_AM                                              | 906.139537 |
| pr_per_O                                               | 2178.010674 | tx_0_10_A                                              | 2177.451667 | tx_OND                                                 | 1362.17488 | tx_0_10_My                                             | 1366.08271  | tx_0_10_O                                              | 908.577224 | tn_A                                                   | 906.519698 |
| etp_OND                                                | 2178.36859  | rv_A                                                   | 2177.598288 | etp_N                                                  | 1362.42507 | rv_Jy                                                  | 1366.289302 | pr_D                                                   | 908.674526 | pr_per_My                                              | 906.749302 |
| pr_O                                                   | 2178.574741 | rv_Jy                                                  | 2177.649359 | rv_OND                                                 | 1362.80252 | tn_My                                                  | 1367.117994 | rv_O                                                   | 908.777182 | rv_A                                                   | 906.818407 |
| rv_OND                                                 | 2178.641003 | rv_AMJJ                                                | 2178.230742 | rv_D                                                   | 1368.06869 | tx_My                                                  | 1367.240544 | tn17_D                                                 | 909.292551 | tn_My                                                  | 907.485838 |
| tn_OND                                                 | 2178.807706 | rv_Ju                                                  | 2178.378976 | pr_per_O                                               | 1368.13519 | etp_Ju                                                 | 1367.581902 | tn17_OND                                               | 909.292551 | tx_0_10_Ju                                             | 907.792724 |
| rv_O                                                   | 2179.023848 | etp_Jy                                                 | 2178.7574   | pr_per_D                                               | 1369.00797 | pr_Jy                                                  | 1367.894517 | pr_OND                                                 | 910.028786 | rv_Jy                                                  | 908.496106 |
| tx_D                                                   | 2179.3881   | pr_A                                                   | 2179.26086  | rv_O                                                   | 1369.39689 | tn_Jy                                                  | 1367.970605 | pr_per_D                                               | 910.551241 | tx_My                                                  | 908.652703 |
| tx_OND                                                 | 2180.012943 | tx_My                                                  | 2179.413862 | etp_OND                                                | 1369.492   | tx_AMJJ                                                | 1368.194813 | rv_OND                                                 | 910.605413 | tx_AMJJ                                                | 909.272228 |
| etp_O                                                  | 2180.058098 | etp_My                                                 | 2179.498325 | pr_D                                                   | 1369.74122 | tx_0_10_Ju                                             | 1368.746031 | rv_D                                                   | 910.616649 | pr_per_Jy                                              | 909.62193  |
| tx_N                                                   | 2180.190247 | tx_0_10_AMJJ                                           | 2179.619854 | pr_O                                                   | 1369.77847 | tx_A                                                   | 1368.870959 | etp_OND                                                | 910.667392 | tn_Jy                                                  | 909.693231 |
|                                                        |             | tx_Jy                                                  | 2179.699485 |                                                        |            | tx_0_10_A                                              | 1368.884744 |                                                        |            | tx_A                                                   | 910.186145 |
|                                                        |             | rv_My                                                  | 2179.702013 |                                                        |            | pr_A                                                   | 1369.010181 |                                                        |            | tx34_My                                                | 910.335992 |
|                                                        |             | pr_per_My                                              | 2179.810947 |                                                        |            | tx34_My                                                | 1369.118759 |                                                        |            | tx_0_10_AM                                             | 910.442333 |
|                                                        |             | etp_AMJJ                                               | 2179.939554 |                                                        |            | pr_per_My                                              | 1369.310156 |                                                        |            | pr_Jy                                                  | 910.515243 |
|                                                        |             | tn_My                                                  | 2179.940421 |                                                        |            | pr_per_Jy                                              | 1369.547421 |                                                        |            | tx_0_10_A                                              | 910.609388 |
|                                                        |             | tx_A                                                   | 2180.066077 |                                                        |            | tx_Jy                                                  | 1369.641994 |                                                        |            | tx_Jy                                                  | 910.658059 |
|                                                        |             | etp_Ju                                                 | 2180.128737 |                                                        |            | tx_0_10_AMJJ                                           | 1369.76345  |                                                        |            | tx_0_10_Jy                                             | 910.661755 |
|                                                        |             | tx_0_10_Jy                                             | 2180.241096 |                                                        |            | tx_0_10_Jy                                             | 1369.787462 |                                                        |            | pr_A                                                   | 910.68147  |

### b-d. Model summary for each yield loss level considered

These variables are then combined with and without interaction and selected from a stepwise selection process. We present the summary of each of these models in one tab per yield loss intensity. The significance of each covariate and the parameter estimation are presented in each table. The Bayesian Information Criteria is used to select the most parsimonious model. Area Under the Curve (AUC) and ROC analysis score of prediction accuracy

b.

| Net Yield loss - Best model summary                                                      |                 |         |          |              |
|------------------------------------------------------------------------------------------|-----------------|---------|----------|--------------|
| tx_0_10_D                                                                                | X1              |         |          |              |
| pr_N                                                                                     | X2              |         |          |              |
| tn_Ju                                                                                    | X5              |         |          |              |
| pr_AMJJ                                                                                  | X6              |         |          |              |
| Call:<br>glm(formula = Anomaly ~ X1 + X2 + X5 + X6 + X1:X6 + X5:X6, family = "binomial") |                 |         |          |              |
| Deviance Residuals:                                                                      |                 |         |          |              |
| Min                                                                                      | 1Q              | Median  | 3Q       | Max          |
| -1.9449                                                                                  | -1.0342         | -0.5513 | 1.1064   | 2.1810       |
| Coefficients:                                                                            |                 |         |          |              |
| Estimate                                                                                 | Std. Error      | z value | Pr(> z ) |              |
| (Intercept)                                                                              | -25.36265       | 2.92769 | -8.663   | < 2e-16 ***  |
| X1                                                                                       | 0.09077         | 0.05680 | 1.598    | 0.11005      |
| X2                                                                                       | 0.13861         | 0.04830 | 2.870    | 0.00411 **   |
| X5                                                                                       | 1.78528         | 0.22330 | 7.995    | 1.29e-15 *** |
| X6                                                                                       | 10.82755        | 1.48063 | 7.313    | 2.62e-13 *** |
| X1:X6                                                                                    | -0.08231        | 0.02747 | -2.996   | 0.00274 **   |
| X5:X6                                                                                    | -0.68960        | 0.10904 | -6.324   | 2.55e-10 *** |
| ---                                                                                      |                 |         |          |              |
| Signif. codes: 0 '***' 0.001 '**' 0.01 '*' 0.05 '.' 0.1 ' ' 1                            |                 |         |          |              |
| (Dispersion parameter for binomial family taken to be 1)                                 |                 |         |          |              |
| Null deviance: 2165.5 on 1565 degrees of freedom                                         |                 |         |          |              |
| Residual deviance: 1932.8 on 1559 degrees of freedom                                     |                 |         |          |              |
| AIC: 1946.8                                                                              |                 |         |          |              |
| Number of Fisher Scoring iterations: 4                                                   |                 |         |          |              |
| <b>BIC</b>                                                                               | <b>1984.302</b> |         |          |              |
| <b>AUC</b>                                                                               | <b>0.702121</b> |         |          |              |

c.

```
Severe Yield loss - Best model summary
pr_per__N          X1
tx_0_10_D          X2
tn_Ju              X5
pr_AMJJ            X6

Call:
glm(formula = Anomaly ~ X1 + X2 + X5 + X6 + X1:X6 + X2:X6 + X5:X6,
     family = "binomial")

Deviance Residuals:
Min      1Q  Median      3Q      Max
-1.8987 -0.5875 -0.4198 -0.2347  2.9980

Coefficients:
Estimate Std. Error z value Pr(>|z|)
(Intercept) -27.71059   3.55653  -7.791 6.62e-15 ***
X1           8.96694   2.15467   4.162 3.16e-05 ***
X2           0.23333   0.07071   3.300 0.000968 ***
X5           1.16851   0.24981   4.678 2.90e-06 ***
X6          10.09938   1.72675   5.849 4.95e-09 ***
X1:X6       -3.03888   0.99918  -3.041 0.002355 **
X2:X6       -0.14971   0.03161  -4.736 2.18e-06 ***
X5:X6       -0.36101   0.12074  -2.990 0.002789 **
---
Signif. codes:  0 '***' 0.001 '**' 0.01 '*' 0.05 '.' 0.1 ' ' 1

(Dispersion parameter for binomial family taken to be 1)

Null deviance: 1355.1  on 1565  degrees of freedom
Residual deviance: 1136.6  on 1558  degrees of freedom
AIC: 1152.6

BIC 1195.402
AUC 0.7550625
```

d.

```
Extreme Yield loss - Best model summary
pr_per__N          X1
tx_0_10_D          X2
tn_Ju              X5
pr_My              X6

Call:
glm(formula = Anomaly ~ X1 + X2 + X5 + X6 + X2:X6 + X5:X6, family = "binomial")

Deviance Residuals:
Min      1Q  Median      3Q      Max
-1.7398 -0.3766 -0.2537 -0.1681  3.0763

Coefficients:
Estimate Std. Error z value Pr(>|z|)
(Intercept) -28.00648   3.25343  -8.608 < 2e-16 ***
X1           4.05692   0.75917   5.344 9.10e-08 ***
X2           0.41742   0.06825   6.116 9.60e-10 ***
X5           1.06084   0.22266   4.764 1.90e-06 ***
X6           8.02909   1.35872   5.909 3.44e-09 ***
X2:X6       -0.20031   0.02595  -7.719 1.18e-14 ***
X5:X6       -0.27408   0.09811  -2.794 0.00521 **
---
Signif. codes:  0 '***' 0.001 '**' 0.01 '*' 0.05 '.' 0.1 ' ' 1

(Dispersion parameter for binomial family taken to be 1)

Null deviance: 895.97  on 1565  degrees of freedom
Residual deviance: 648.71  on 1559  degrees of freedom
AIC: 662.71

Number of Fisher Scoring iterations: 6

BIC                                700.2024
AUC                                0.8291997
```



### Supplementary Table 3

**Odds and risk ratios of net, severe and extreme yield loss** in the French Breadbasket in 2016 computed from prior and estimated probabilities from a dataset trained in the study area from 1958 to 2016 (dataset including the 2015-2016 growing season) and from 1958 to 2015 (dataset excluding the 2015-2016 growing season). Information added by the statistical model can be viewed as the difference between prior and posterior probabilities. Posterior probabilities are presented by their median and 10-90<sup>th</sup> percentiles probability values. The full inter-*departements* distribution and estimated probabilities and their confidence intervals are presented in Supplementary Figure 7.

| <b>NET YIELD LOSS</b>                |       |           |             |            |            |
|--------------------------------------|-------|-----------|-------------|------------|------------|
| <b>Median values across counties</b> |       |           |             |            |            |
|                                      | Prior | Posterior | Probability | Risk ratio | Odds ratio |
| Training dataset Excl. 2016          | 0.46  | 0.80      | (0.74-0.84) | 1.74       | 4.80       |
| Training dataset Incl. 2016          | 0.47  | 0.85      | (0.81-0.89) | 1.81       | 6.57       |

| <b>SEVERE YIELD LOSS</b>             |       |           |             |            |            |
|--------------------------------------|-------|-----------|-------------|------------|------------|
| <b>Median values across counties</b> |       |           |             |            |            |
|                                      | Prior | Posterior | Probability | Risk ratio | Odds ratio |
| Training dataset Excl. 2016          | 0.14  | 0.46      | (0.32-0.56) | 3.23       | 5.11       |
| Training dataset Incl. 2016          | 0.16  | 0.69      | (0.49-0.84) | 4.42       | 12.03      |

| <b>EXTREME YIELD LOSS</b>            |       |           |             |            |            |
|--------------------------------------|-------|-----------|-------------|------------|------------|
| <b>Median values across counties</b> |       |           |             |            |            |
|                                      | Prior | Posterior | Probability | Risk ratio | Odds ratio |
| Training dataset Excl. 2016          | 0.07  | 0.71      | (0.23-0.97) | 10.67      | 34.83      |
| Training dataset Incl. 2016          | 0.08  | 0.93      | (0.42-0.99) | 11.14      | 136.37     |

### Supplementary discussion

To check whether our results were robust to a change in statistical model, we fitted a series of models using the same selection procedure as described before but with normalized anomalies as the response variable.

We first fit each climatic variable independently to normalized yield anomalies – per yield loss levels – and select the best covariates based on BIC. Then we combine the selected variables using a stepwise selection based on BIC. We found that the model leading to the lowest BIC included the same variables as those of the binomial logistic model, i.e., with the number of days between 0 and 10°C in the autumn, the number of rainy days in November, minimum temperature in June and precipitation in the spring (AMJJ).

As above, two interactions are also selected: between with the number of days between 0 and 10°C and precipitation in the spring and the interaction between temperature in June and precipitation in the spring. All covariates are highly significant (p-value <

0.001). Supplementary Figure 4 shows that the predictions of normalized yield anomalies and predicted probabilities of yield loss follow similar patterns. A few additional moderate loss years were also identified by the linear model (1966,1970 and 2007).

### **Supplementary References**

1. Semences de France (2016) Rendements catastrophiques du blé en 2016 : la pluie, seule responsable? Available at: <http://www.semencesdefrance.com/actualite-semences-de-france/rendements-catastrophiques-ble-2016-pluie-seule-responsable/>.
2. Académie d'agriculture de France (2016) La production de céréales à paille en France en 2016 - qualité sanitaire et technologique des grains, quelques éléments d'explication à partir de l'exemple du blé tendre.
3. Jean-Charles DESWARTE (Arvalis) (2017) Bilan agro-climatique et conséquences sur le rendement des céréales à paille.
4. FranceAgriMer (2016) CereObs. Available at: <https://cereobs.franceagrimer.fr/Pages/publications.aspx> [Accessed February 5, 2017].
